# Supplementary material
Source: PubMed Central journal article supplement (PMC3591660)
Supplement: supp_M112.020198_mcp.M112.020198-1.pdf [file supp_M112.020198_mcp.M112.020198-1.pdf]

## Supplemental Data

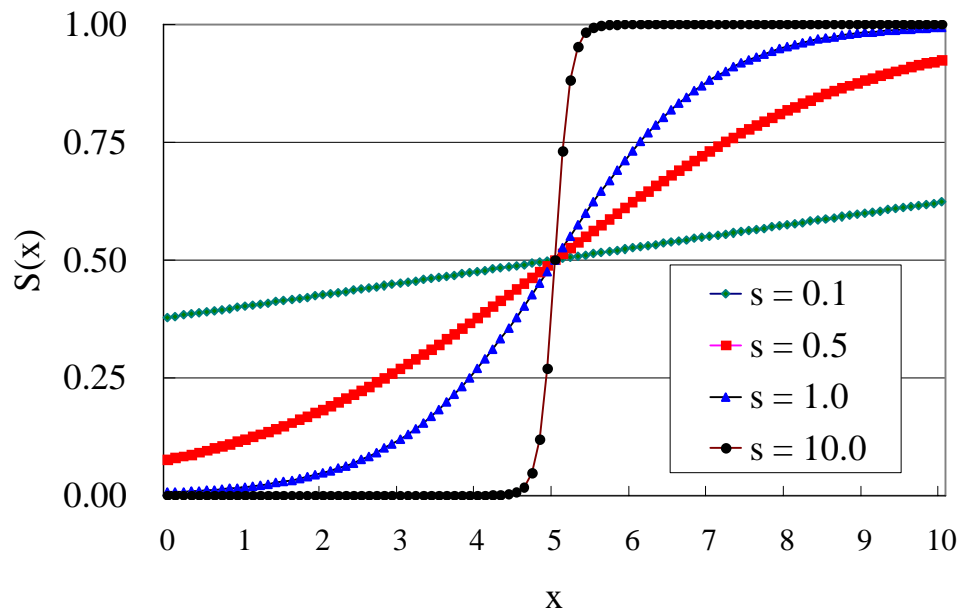

Figure S1. Plots of the  $S(x)$  function (Equation (2) in the main text) at  $h=5$ . The plot of  $s=0.5$  (red squares) was used in this study.

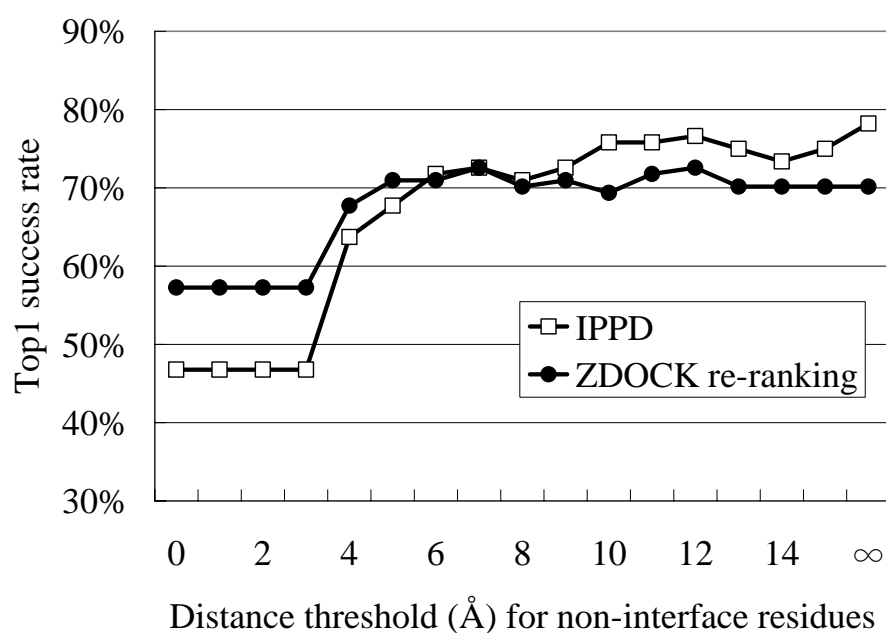

Figure S2. Top1 success rates for 124 benchmark complexes of IPPD and ZDOCK re-ranking using unbound structures with information of all interface residues and various amount of non-interface residues as determined by a distance threshold from interface residues. Any surface residue not assigned to be an interface residue was defined as a non-interface residue if the distance between its C $\alpha$  atom and the C $\alpha$  atom of any interface residues was less than the distance threshold.  $\infty$  indicates all surface residues that were not interface residues were defined as non-interface residues. All simulations in the main text used the  $\infty$  threshold for non-interface residues.
